# Supplementary material for: Clostridium butyricum MIYAIRI 588 Modifies Bacterial Composition under Antibiotic-Induced Dysbiosis for the Activation of Interactions via Lipid Metabolism between the Gut Microbiome and the Host
Source: MDPI journal article supplement (doi:10.3390/biomedicines9081065), 2021-08-22

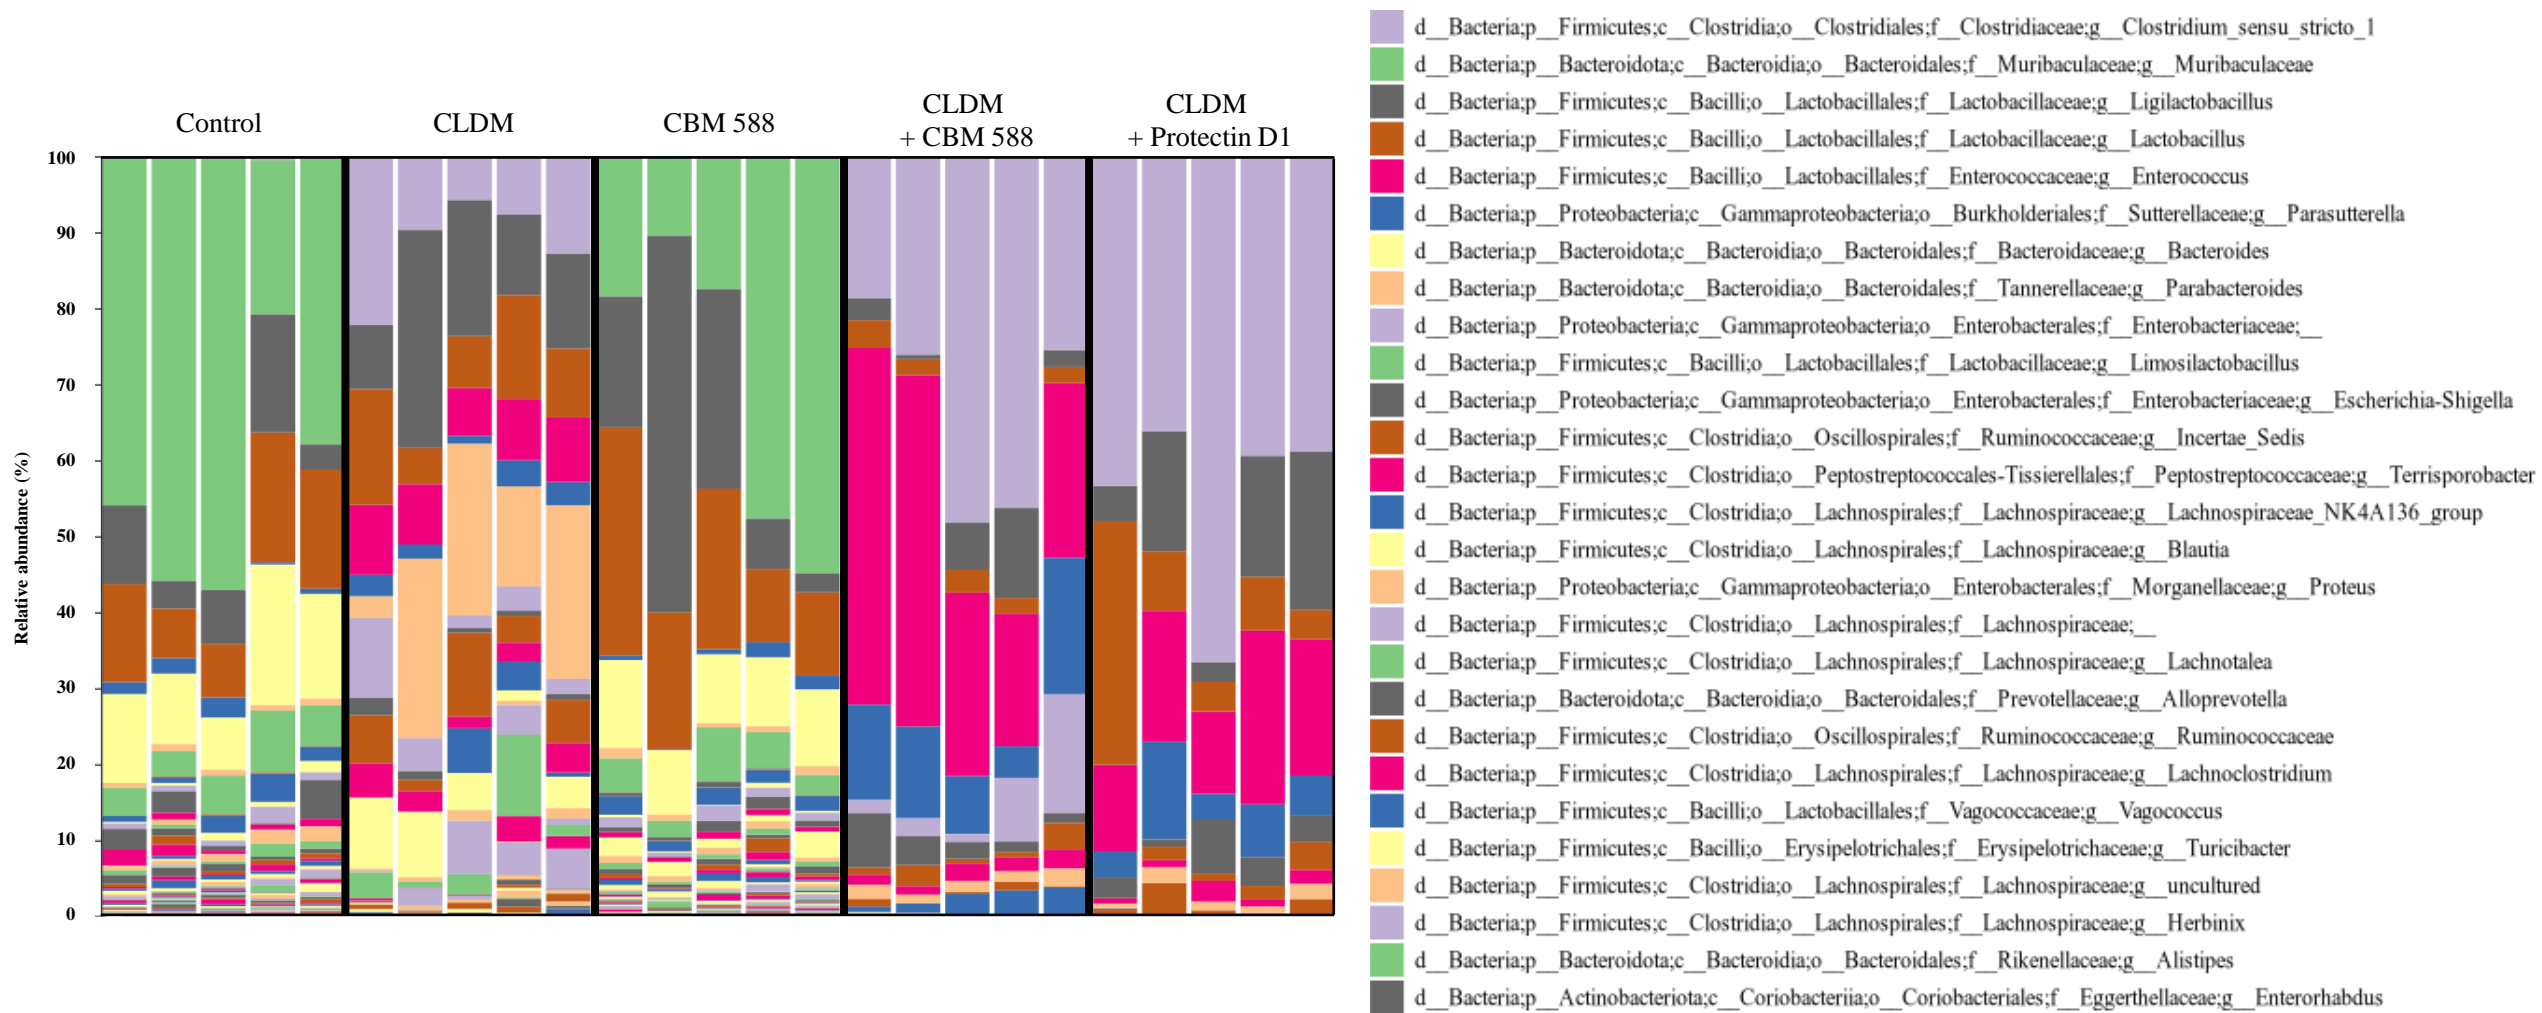

Figure S1. Bacterial compositions in different experimental groups at the genus level. The vertical axis shows relative abundance (%) per the whole (n = 5 in each group).

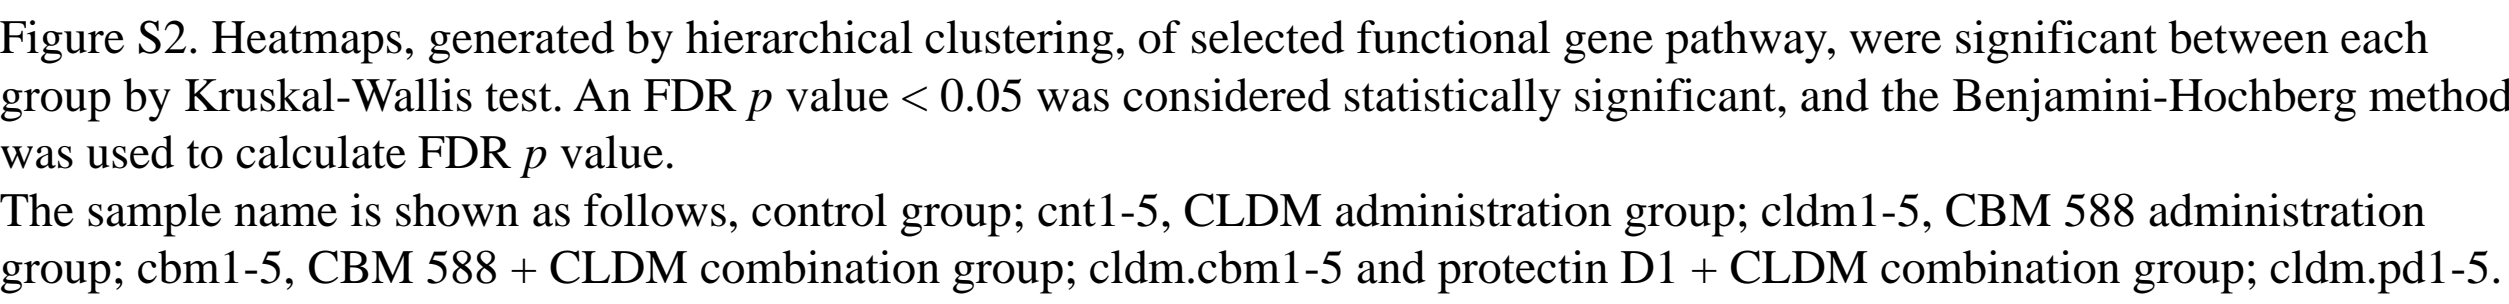

Supplement: s1 [file s1]
